# Supplementary material for: Effects of CO2 and temperature on the structure and chemistry of C–(A–)S–H investigated by Raman spectroscopy
Source: Royal Society of Chemistry journal article supplement (doi:10.1039/c7ra07266j), 2017-01-01
Supplement: c7ra07266j1.pdf [file c7ra07266j1.pdf]

## SUPPORTING INFORMATION

### Effects of CO<sub>2</sub> and Temperature on the Structure and Chemistry of C-(A)-S-H Investigated by Raman Spectroscopy

Sinem Ortabay<sup>a,b</sup>, Jiaqi Li<sup>c</sup>, Guoqing Geng<sup>c</sup>, Rupert J. Myers<sup>c,d</sup>, Paulo J. M. Monteiro<sup>c</sup>, Roya Maboudian<sup>a</sup>, Carlo Carraro<sup>a</sup>

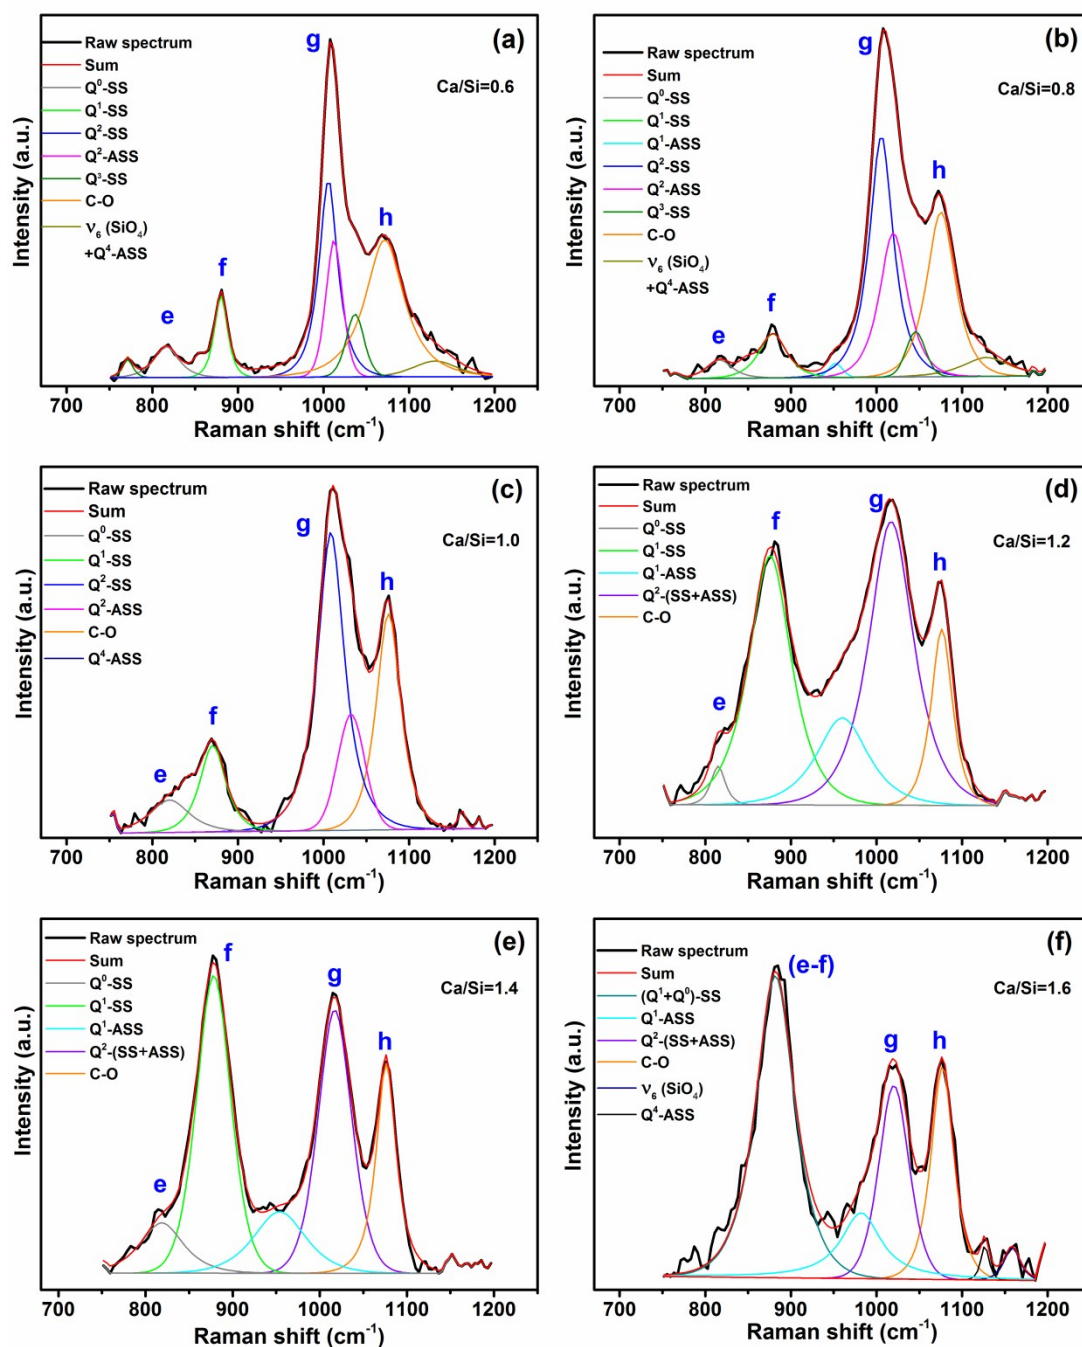

Figure S1. Deconvoluted peaks of C-S-H samples with Ca/Si molar ratio of a) 0.6, b) 0.8, c) 1.0, d) 1.2, e) 1.4 and f) 1.6 in the range of 750-1200 cm<sup>-1</sup>. All the samples have been equilibrated at 20 °C.

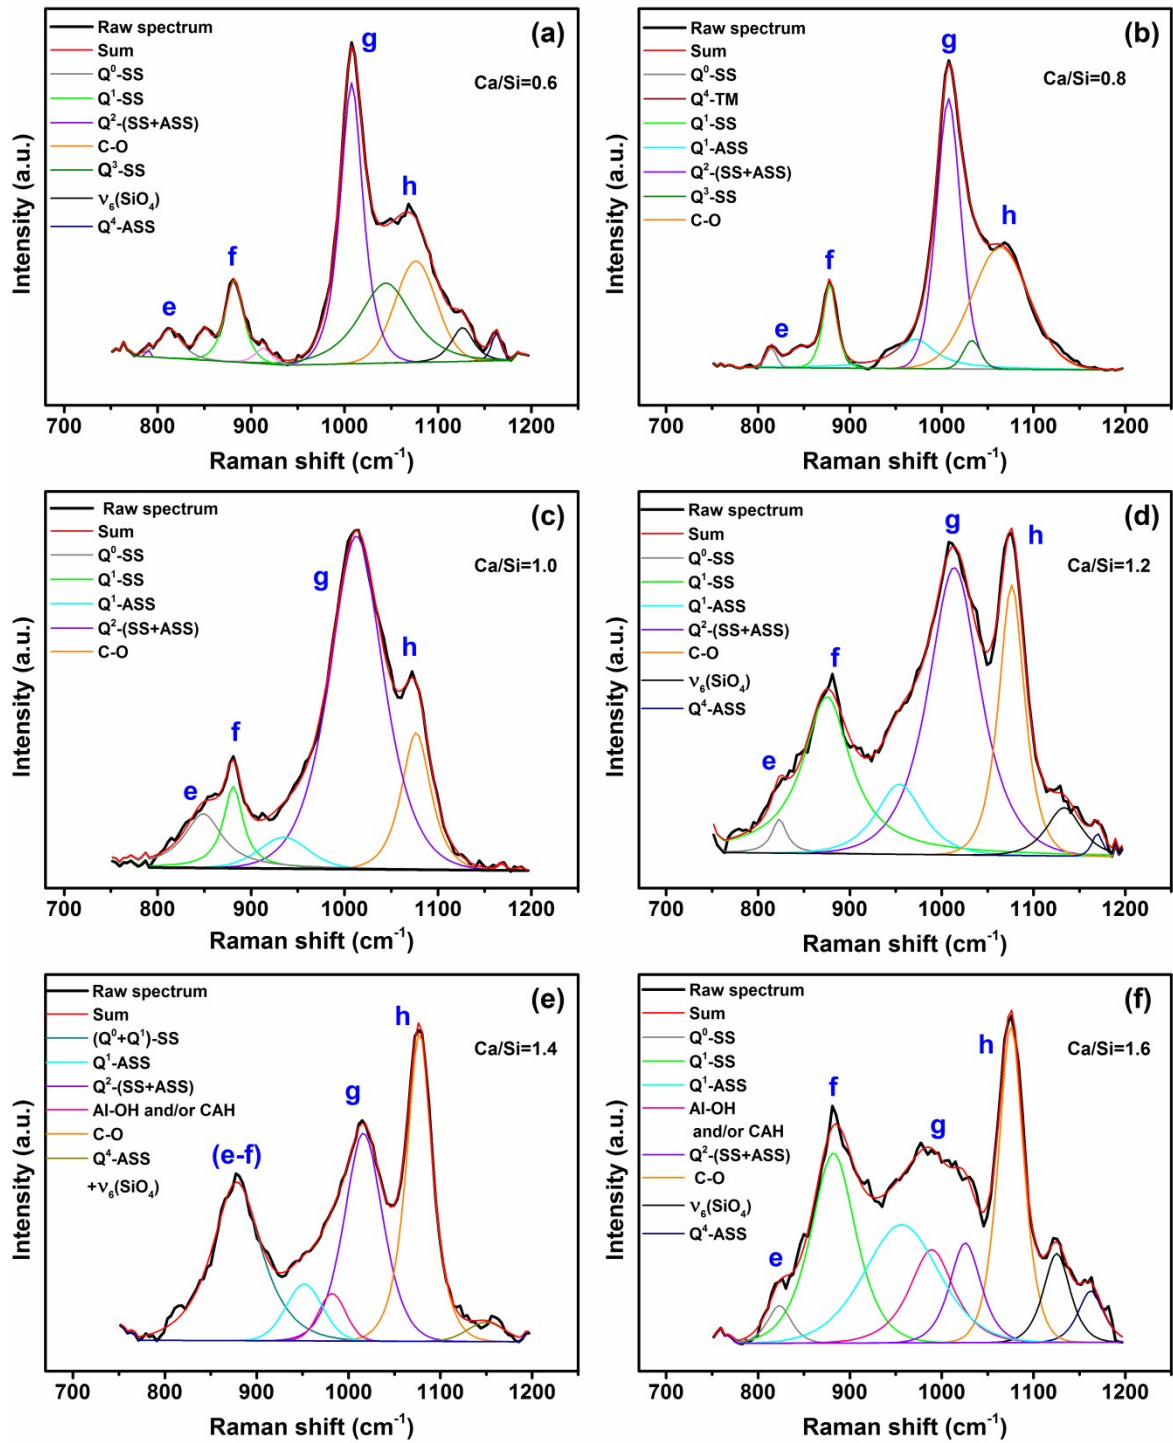

Figure S2. Deconvoluted peaks of C-A-S-H samples (Al/Si=0.05) with Ca/Si molar ratio of a) 0.6, b) 0.8, c) 1.0, d) 1.2, e) 1.4 and f) 1.6 in the range of 750-1200  $\text{cm}^{-1}$ . All the samples have been equilibrated at 20 °C.

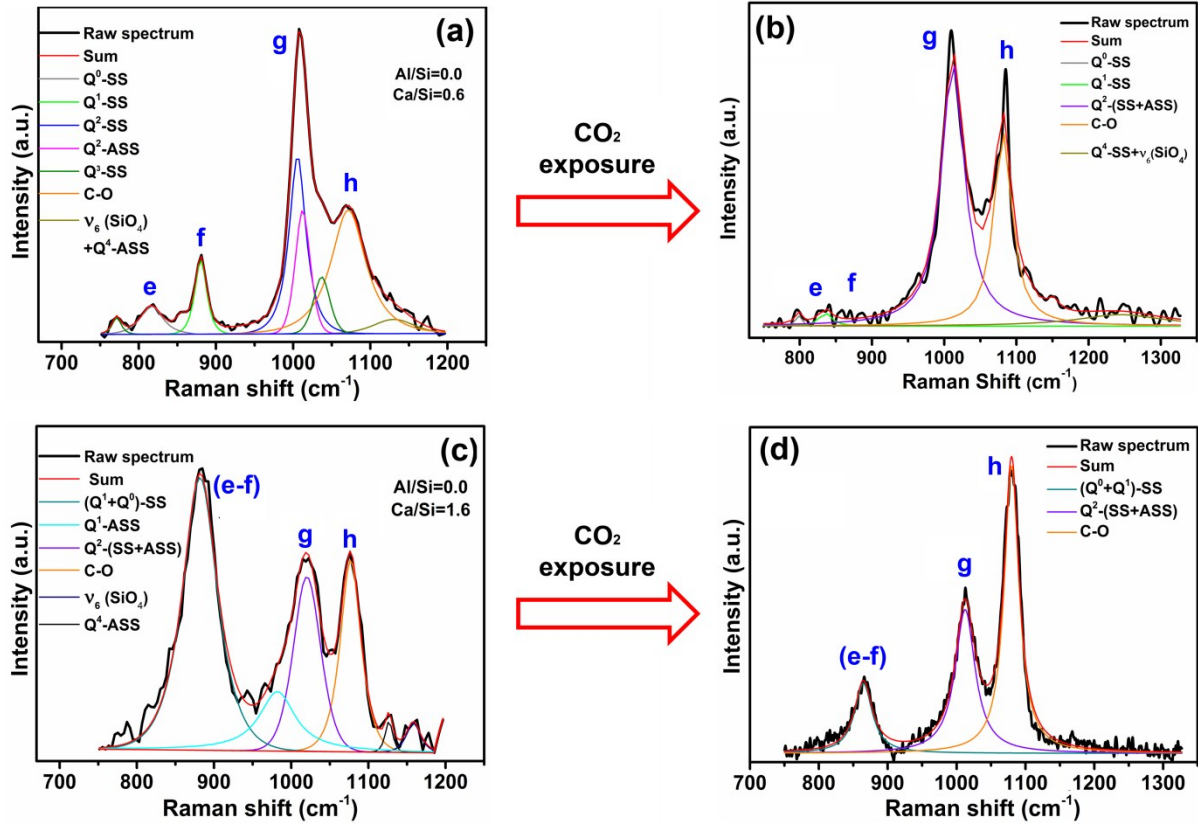

Figure S3. Effect of CO<sub>2</sub> uptake on Al-free samples for the low Ca/Si molar ratio. a) Before, b) after 10 days exposure; for high Ca/Si molar ratio, c) before and d) after CO<sub>2</sub> uptake. The images have been extracted from Figure 4a at the range of 750 -1200 cm<sup>-1</sup>.

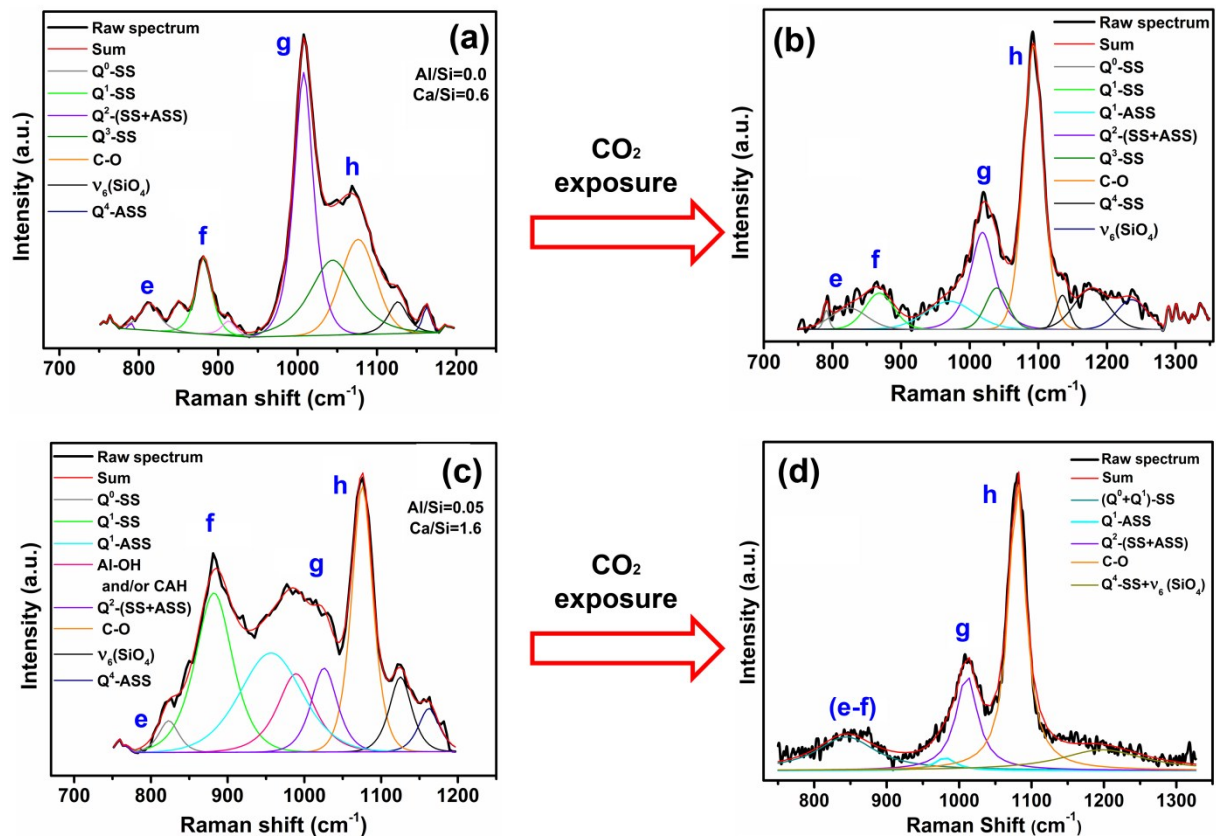

Figure S4. Effect of CO<sub>2</sub> uptake on Al-containing samples (Al/Si=0.05) for the low Ca/Si molar ratio a) before, b) after 10 days exposure; for high Ca/Si molar ratio c) before and d) after CO<sub>2</sub> uptake. The images have been extracted from Figure 4b at the range of 750 -1200 cm<sup>-1</sup>.

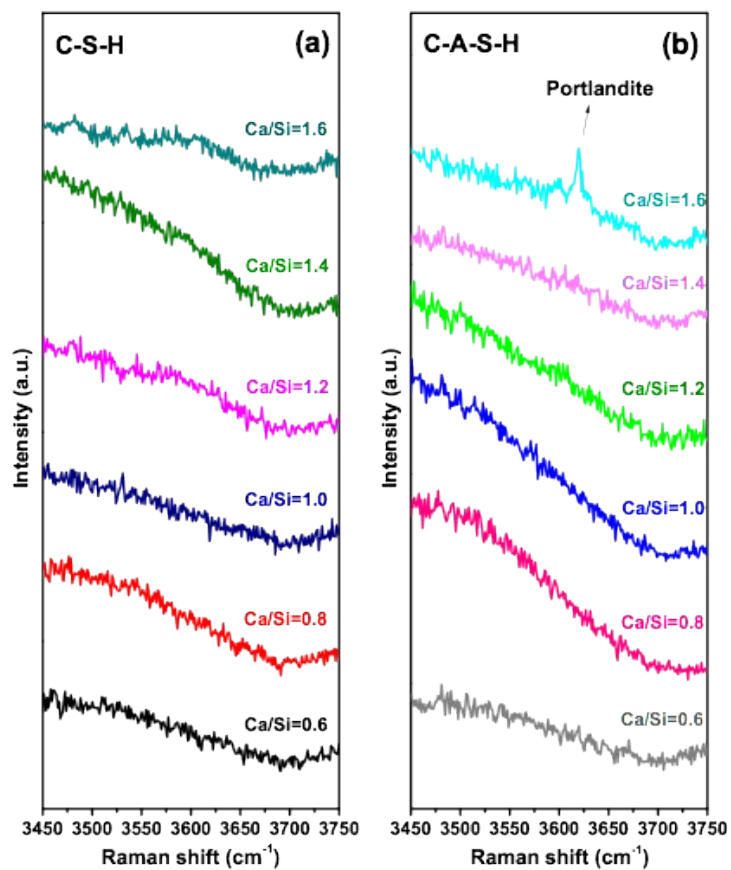

Figure S5. Raman spectra of C-S-H and C-A-S-H ( $\text{Al/Si} = 0.05$ ) samples with Ca/Si molar ratios from 0.6 to 1.6. All samples were synthesized at  $20^\circ\text{C}$ .

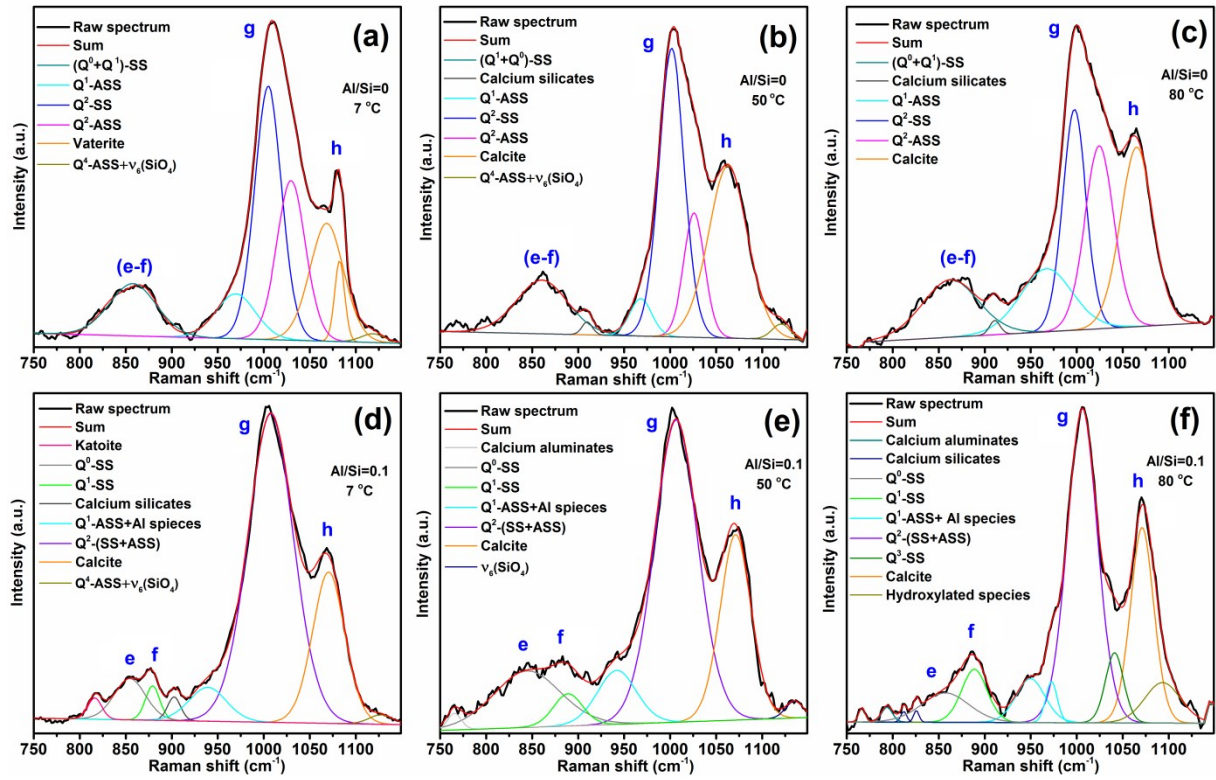

Figure S6. Deconvoluted spectra showing the effect of synthesis temperature on C-S-H at a) 7 °C , b) 50 °C , c) 80 °C and C-A-S-H samples with Al/Si=0.1 at d) 7 °C, e) 50 °C, f) 80 °C. The images have been extracted from Figure 5 at the range of 750 -1150  $\text{cm}^{-1}$ . For all samples, Ca/Si= 1.0.
